# Supplementary material
Source: PubMed Central journal article supplement (PMC3145278)
Supplement: mmc1.pdf [file mmc1.pdf]

## Supplementary Materials

### **Membrane Tension, Lipid Adaptation, Conformational Changes, and Energetics in MscL Gating**

Huan Rui, Ritesh Kumar and Wonpil Im<sup>\*</sup>

Department of Molecular Biosciences and Center for Bioinformatics  
The University of Kansas, 2030 Becker Drive, Lawrence, Kansas 66047, USA

Keywords: Mechanosensitive Channels; Free Energy; Membrane Thinning;  
Hydrophobic Mismatch

---

<sup>\*</sup> Corresponding: [wonpil@ku.edu](mailto:wonpil@ku.edu)

**Table S1.** The average system and protein dimensions in  $XY$  for  $\delta\tau = 1^\circ$  and  $30^\circ$ .

| $\delta\tau$ | $L_X = L_Y$ <sup>#</sup> | $L_{\text{top}}$ <sup>\$</sup> | $L_{\text{bot}}$ <sup>%</sup> | $(L_X - L_{\text{top}}) / 2$ | $(L_X - L_{\text{bot}}) / 2$ |
|--------------|--------------------------|--------------------------------|-------------------------------|------------------------------|------------------------------|
| $1^\circ$    | 96.3                     | 55.1                           | 51.2                          | 20.6                         | 22.6                         |
| $30^\circ$   | 109.1                    | 74.1                           | 64.3                          | 17.5                         | 22.4                         |

<sup>#</sup>The average system size in  $XY$ . <sup>\$</sup>The maximum protein extent ( $Z > 0$ ) in  $XY$ . <sup>%</sup>The maximum protein extent ( $Z < 0$ ) in  $XY$ .

**TABLE S2.** The free energy difference (in kcal/mol) between  $\delta\tau = 1^\circ$  and  $30^\circ$  for TM1 and TM2 in all Tb-MscL subunits.

|   | TM1            | TM2            |
|---|----------------|----------------|
| A | $7.6 \pm 1.4$  | $6.4 \pm 2.5$  |
| B | $-2.8 \pm 1.5$ | $7.3 \pm 1.2$  |
| C | $7.9 \pm 1.9$  | $12.4 \pm 1.8$ |
| D | $-4.6 \pm 1.3$ | $5.3 \pm 1.9$  |
| E | $5.7 \pm 1.3$  | $12.7 \pm 1.4$ |

**TABLE S3.** Decomposition of  $\Delta G_{\text{TM1}}$  or  $\Delta G_{\text{TM2}}$  into  $\Delta G_{\text{TM-TM}}$ ,  $\Delta G_{\text{TM-MEMB}}$ , and  $\Delta G_{\text{TM-SOLV}}$  (in kcal/mol) at  $\delta\tau = 30^\circ$ .

|   | TM1                       |                             |                             |                         | TM2                       |                             |                             |                         |
|---|---------------------------|-----------------------------|-----------------------------|-------------------------|---------------------------|-----------------------------|-----------------------------|-------------------------|
|   | $\Delta G_{\text{TM-TM}}$ | $\Delta G_{\text{TM-MEMB}}$ | $\Delta G_{\text{TM-SOLV}}$ | $\Delta G_{\text{TM1}}$ | $\Delta G_{\text{TM-TM}}$ | $\Delta G_{\text{TM-MEMB}}$ | $\Delta G_{\text{TM-SOLV}}$ | $\Delta G_{\text{TM2}}$ |
| A | -1.8±2.8                  | 0.0±0.2                     | 9.4±1.6                     | 7.6                     | 7.8±2.0                   | -0.7±0.2                    | -0.7±0.6                    | 6.4                     |
| B | 4.3±1.9                   | -1.0±0.2                    | -6.1±0.8                    | -2.8                    | 7.9±1.3                   | -0.3±0.1                    | -0.2±0.4                    | 7.3                     |
| C | -0.1±1.3                  | -0.2±0.1                    | 8.1±1.8                     | 7.9                     | 13.4±1.5                  | 0.0±0.1                     | -1.0±0.3                    | 12.4                    |
| D | -4.2±1.0                  | -0.5±0.1                    | 0.1±1.3                     | -4.6                    | 5.0±1.3                   | -0.3±0.2                    | 0.6±0.9                     | 5.3                     |
| E | -1.7±1.5                  | -0.4±0.3                    | 7.7±2.0                     | 5.7                     | 13.7±1.7                  | -0.3±0.1                    | -0.7±0.4                    | 12.7                    |

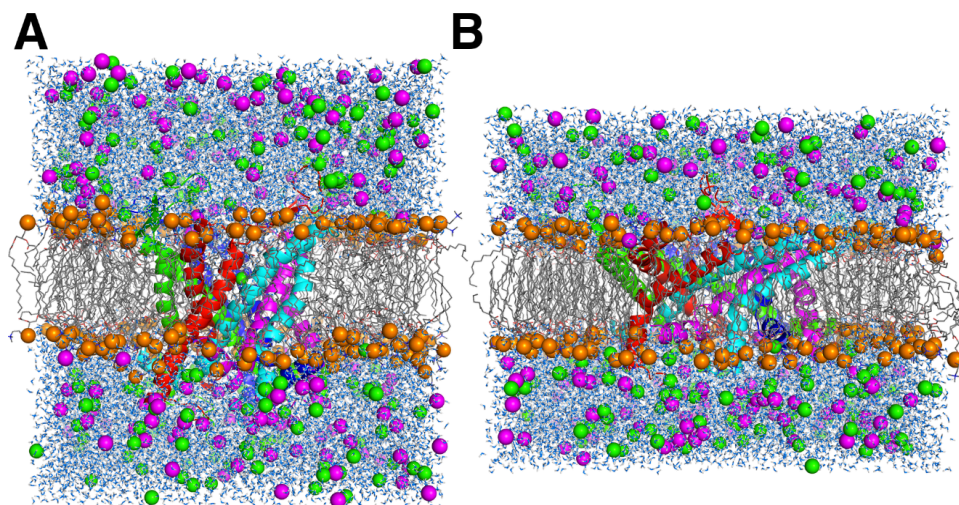

**FIGURE S1.** Molecular representation of (A) the final snapshot in system  $\delta\tau_1$  and (B) the final snapshot in system  $\delta\tau_{30}$ . The Tb-MscL pentamer (*red, green, blue, magenta, and cyan*) is embedded in a DMPC bilayer (*grey*). The water molecules (*marine*) are in line representation.  $K^+$  (*magenta*) and  $Cl^-$  (*green*) ions and phosphate atoms (*orange*) are represented by spheres.

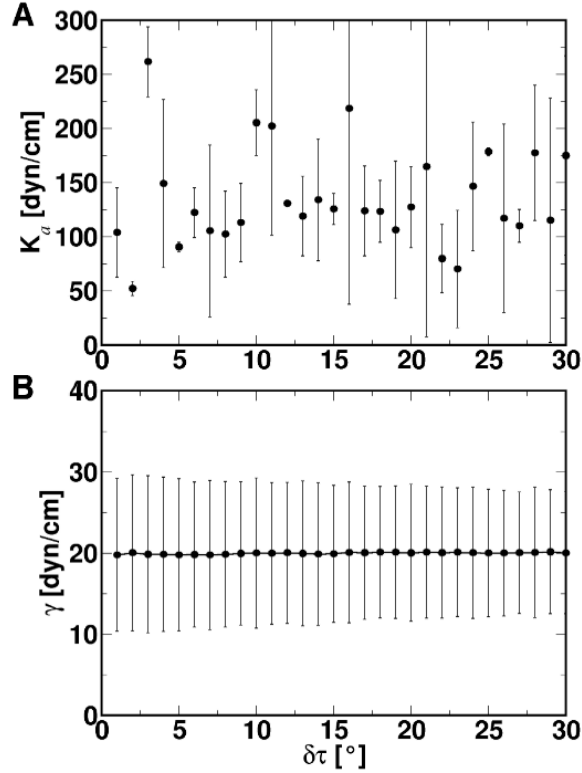

**FIGURE S2.** (A) The area compressibility ( $K_a$ ) of all the systems. (B) Membrane tension ( $\gamma$ ) calculated from pressure tensors:  $\gamma = \langle L_z(P_{zz} - (P_{xx} + P_{yy})/2) \rangle / 2$ , where  $L_z$  is the length of the simulation cell along the Z-axis and  $P_{xx}$ ,  $P_{yy}$ , and  $P_{zz}$  are the X, Y, and Z components of the pressure tensor. The coefficient of 1/2 arises from the two identical interfaces in the system.  $\gamma$  is a constant surface tension applied on the membrane to reproduce the correct equilibrium area per-lipid in simulations and its value is held at 20 dyn/cm. It is also different from the excess tension  $\gamma_{ex}$ , which is derived based on area expansion and fluctuation and is not present in the system.

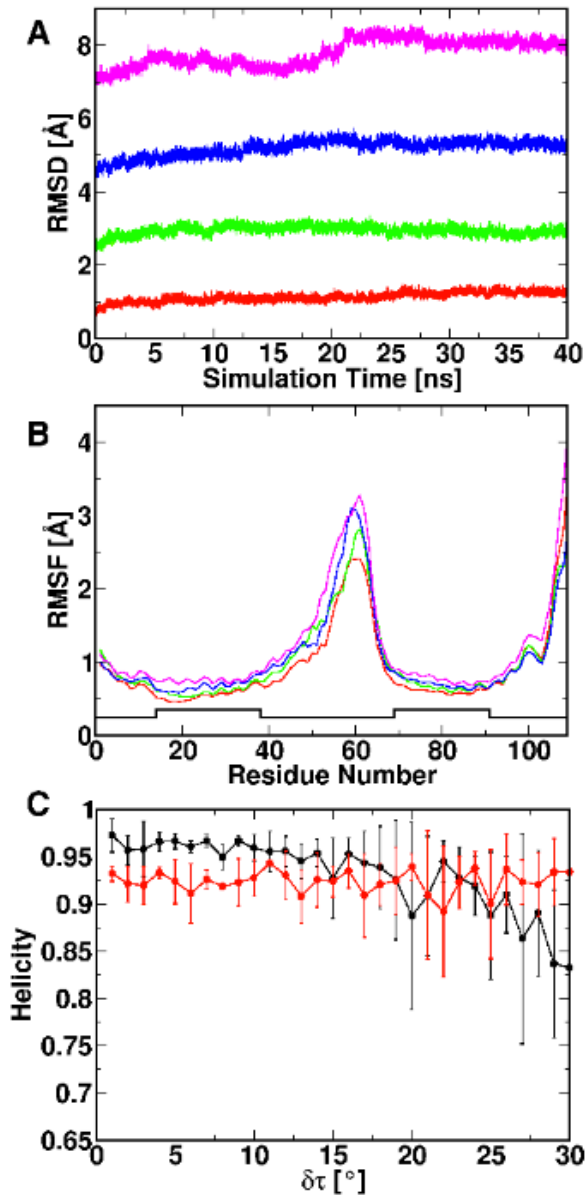

**FIGURE S3.** (A) RMSD of TM1 and TM2 backbone atoms as a function of simulations time in the  $\delta\tau_1$  (red),  $\delta\tau_{10}$  (green),  $\delta\tau_{20}$  (blue), and  $\delta\tau_{30}$  (magenta) systems. (B) Residual backbone RMSF in  $\delta\tau_1$  (red),  $\delta\tau_{10}$  (green),  $\delta\tau_{20}$  (blue), and  $\delta\tau_{30}$  (magenta). (C) The average helicity of TM1 (black) and TM2 (red) for all systems. The standard error calculated from the averages of the five subunits is also plotted. The helicity is characterized as the ratio between the number of instantaneous and total possible H-bonds in a given TM helix.

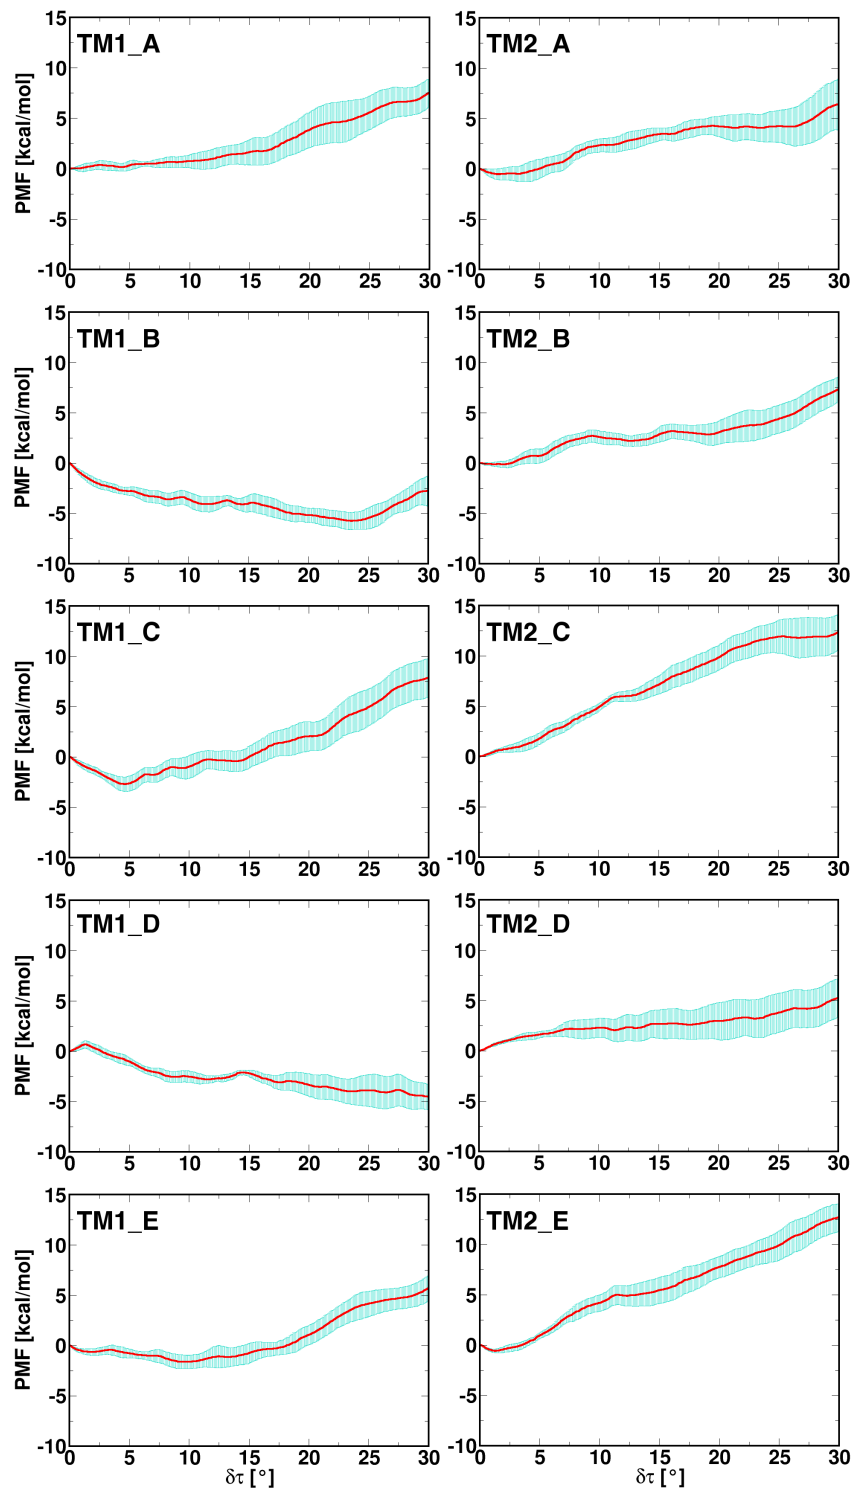

**FIGURE S4.** The PMFs of TM1 and TM2 in each subunit as a function of  $\delta\tau$ . The standard deviation (cyan) is calculated by sequentially dividing the 30-ns trajectory in each  $\delta\tau$  window into 6 pieces of 5-ns duration.



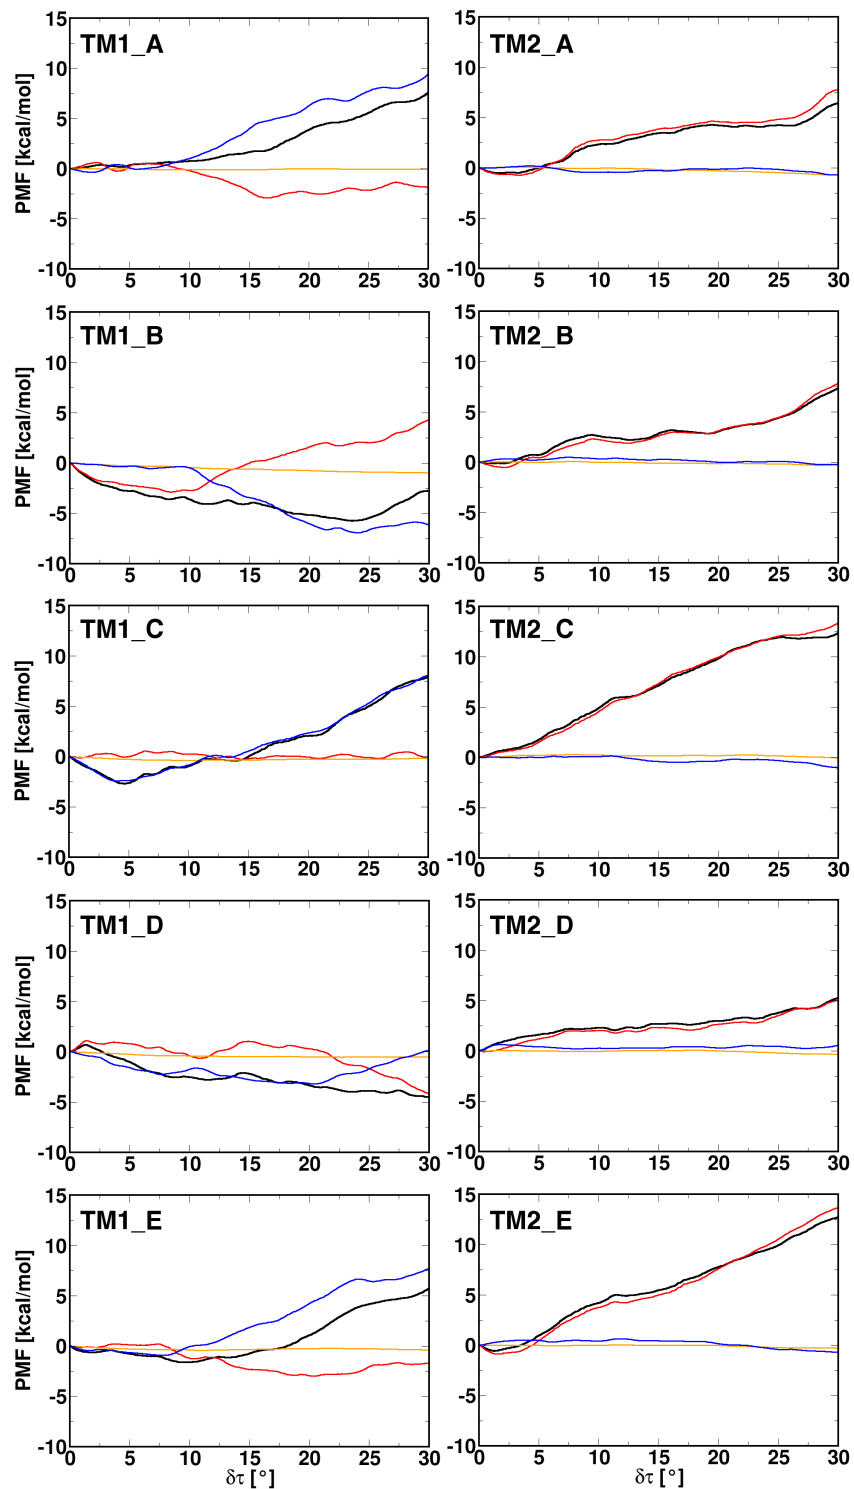

**FIGURE S5.** The PMF decomposition of TM1 and TM2 in each subunit as a function of  $\delta\tau$ . The total PMF (*black*) of each TM helix is decomposed into three contributions:  $\Delta G_{\text{TM-TM}}$  (*red*),  $\Delta G_{\text{TM-MEMB}}$  (*orange*), and  $\Delta G_{\text{TM-SOLV}}$  (*blue*).

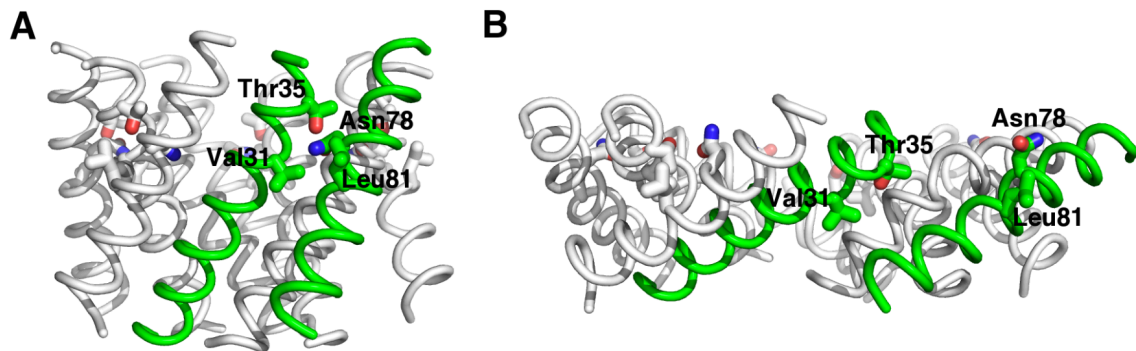

**FIGURE S6.** Molecular representation of subunit B (green) in (A) the X-ray structure of Tb-MscL and (B) system  $\delta\tau_{30}$ . Val31, Thr35, Leu81, and Asn78 are shown in stick representation.
